# Supplementary material for: The inhibitory mechanism of a fullerene derivative against amyloid-β peptide aggregation: an atomistic simulation study
Source: Royal Society of Chemistry journal article supplement (doi:10.1039/c6cp01014h), 2016-01-01
Supplement: c6cp01014h1.pdf [file c6cp01014h1.pdf]

## Supporting Information

### The Inhibitory Mechanism of a Fullerene Derivative against Amyloid- $\beta$ peptide aggregation: an Atomistic Simulation Study

Yunxiang Sun, Zhenyu Qian and Guanghong Wei\*

State Key Laboratory of Surface Physics, Key Laboratory for Computational Physical  
Sciences (MOE), and Department of Physics, Fudan University, 220 Handan Road,  
Shanghai, 200433, China

**This material contains the temperature list of REMD simulation for isolated A $\beta$   
dimer and A $\beta$  dimer with DMF molecules systems, two supplementary tables  
and 11 supplementary figures.**

#### **Temperature lists of REMD simulation:**

The temperature list for isolated A $\beta$  dimer system is: 306.30, 308.16, 310.03, 311.91,  
313.80, 315.70, 317.60, 319.51, 321.44, 323.37, 325.32, 327.26, 329.22, 331.19,  
333.16, 335.14, 337.13, 339.14, 341.15, 343.17, 345.20, 347.24, 349.29, 351.35,  
353.41, 355.49, 357.58, 359.67, 361.78, 363.90, 366.08, 368.22, 370.37, 372.52,  
374.69, 376.86, 379.05, 381.24, 383.45, 385.66, 387.89, 390.12, 392.37, 394.62,  
396.89, 399.17, 401.45, 403.75, 406.06, 408.38, 410.71, 413.05, 415.41, 417.77.

The temperature list for A $\beta$  dimer with DMF molecules system is: 306.30, 308.17,  
309.98, 311.86, 313.76, 315.66, 317.56, 319.48, 321.41, 323.34, 325.29, 327.24,  
329.20, 331.17, 333.15, 335.14, 337.14, 339.15, 341.17, 343.19, 345.23, 347.27,  
349.33, 351.36, 353.43, 355.51, 357.60, 359.70, 361.81, 363.93, 366.06, 368.20,  
370.35, 372.51, 374.68, 376.86, 379.04, 381.24, 383.45, 385.67, 387.90, 390.14,  
392.51, 394.77, 397.05, 399.33, 401.62, 403.92, 406.24, 408.56, 410.89, 413.24,  
415.60, 417.97.

## Two supplementary tables:

Table S1. The secondary structure details of each  $\beta$ -hairpin observed in the top ten most-populated clusters for isolated A $\beta$  dimer system, the  $\beta$ -1 and  $\beta$ -2 refers to the first and second  $\beta$ -strand of the  $\beta$ -hairpin, and the loop refers to the region connecting the two  $\beta$ -strands of the  $\beta$ -hairpin.

|            | $\beta$ 1                 | loop                  | $\beta$ 2                 |
|------------|---------------------------|-----------------------|---------------------------|
| Cluster-1  | --                        | --                    | --                        |
| Cluster-2  | 17LVFFAED23               | 24VGSNKG29            | 30A IGLMV36               |
| Cluster-3  | 11EVHHQKLVFFAE22          | 23DVGSN27             | 28KGAIIGLMVGGV39          |
| Cluster-4  | 16KLVFFAE21               | 22EDVGSNKGAI32        | 33GLMVGG38                |
| Cluster-5  | 16KLVFF20<br>18VFFAE 22   | 21AEDV24<br>23DVGSN27 | 25GSNKG29<br>28KGAI32     |
| Cluster-6  | 18LVFFAEDV24<br>17LVFFA21 | 25GS26<br>22ED23      | 27NKGA IIG33<br>24VGSNK28 |
| Cluster-7  | 17LVFFA21                 | 22ED23                | 24VGSNK28                 |
| Cluster-8  | 16KLVFFAE22               | 23DVGSN27             | 28KGAIIGL34               |
| Cluster-9  | --                        | --                    | --                        |
| Cluster-10 | --                        | --                    | --                        |

Table S2. The secondary structure details of each  $\beta$ -hairpin observed in the top ten most-populated clusters for A $\beta$  dimer with DMF molecules, the  $\beta$ -1 and  $\beta$ -2 refers to the first and second  $\beta$ -strand of the  $\beta$ -hairpin, and the loop refers to the region connecting the two  $\beta$ -strands of the  $\beta$ -hairpin.

|            | $\beta$ 1 | loop           | $\beta$ 2   |
|------------|-----------|----------------|-------------|
| Cluster-1  | --        | --             | --          |
| Cluster-2  | --        | --             | --          |
| Cluster-3  | --        | --             | --          |
| Cluster-4  | --        | --             | --          |
| Cluster-5  | 18VFFAE22 | 23DVGSN27      | 28KGAIIG 32 |
| Cluster-6  | 10YEVHH14 | 15QK16         | 17LVFFA21   |
| Cluster-7  | --        | --             | --          |
| Cluster-8  | 7DSGYEV12 | 13HHQ15        | 16KLVFFA21  |
| Cluster-9  | 17LVFFA21 | 22EDVGSNKGAI31 | 32GLMVG36   |
| Cluster-10 | --        | --             | --          |

## 11 supplementary figures:

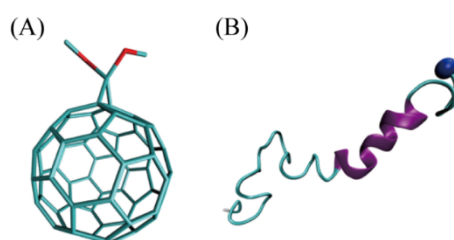

Figure S1. The chemical structure of DMF molecule, carbon atoms are in cyan, oxygen atoms in red, nitrogen atoms in blue, and hydrogen atoms in white(A). The initial conformation of the A $\beta$ 1-42, the C $\alpha$ -atom in the N-terminal is represented by a blue bead (B).

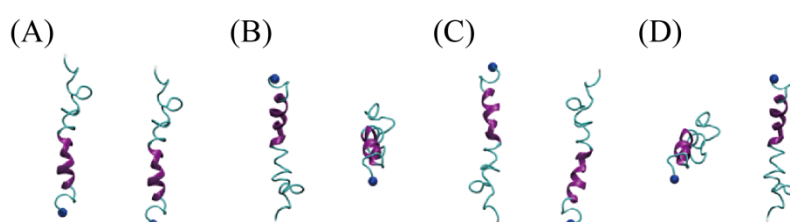

Figure S2. The initial conformation of A $\beta$ 1-42 dimer used for our REMD simulations: (A) dimer with parallel orientation, (B) (D) dimer with cross orientation, (C) dimer with anti-parallel orientation

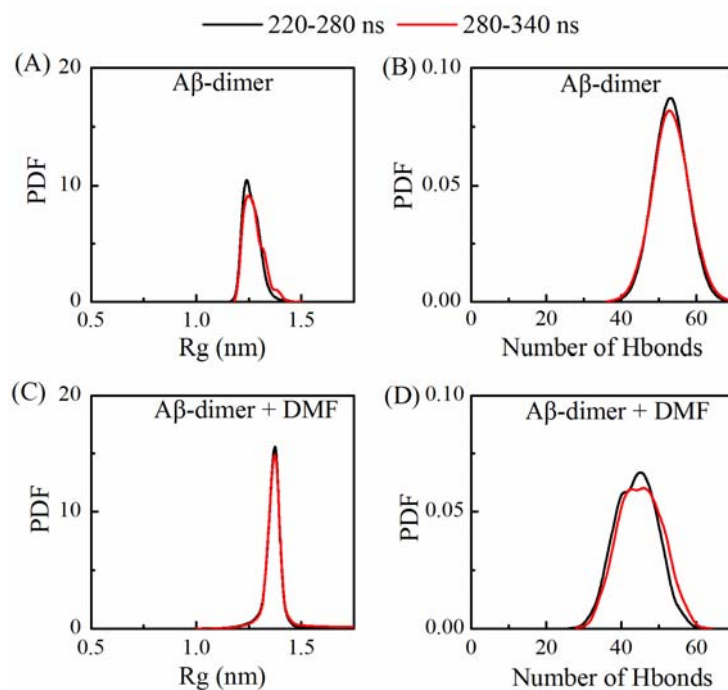

Figure S3. Simulation convergence assessment. Probability density function (PDF) of radius of gyration (Rg) and the number of hydrogen bonds (H-Bonds) for both A $\beta$  dimer system (A,B) and A $\beta$  dimer with four DMF system (C,D) within the time intervals of 220-280 ns (black) and 280-340 ns (red) at 310 K.

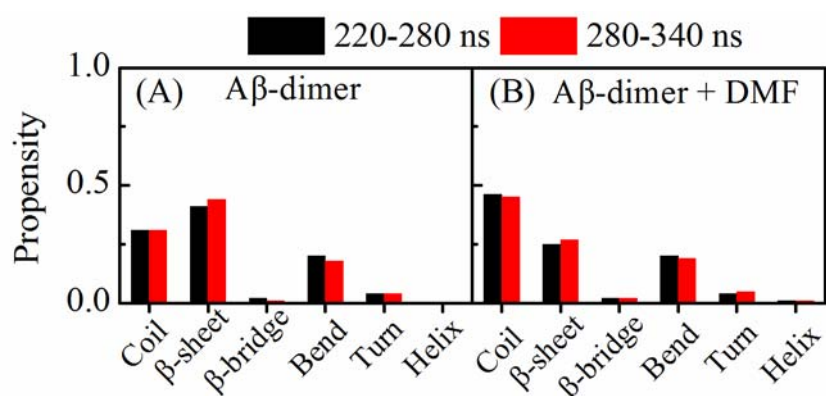

Figure S4. The averaged secondary structure propensities for the Aβ dimer system (A) and Aβ dimer with four DMF system (B) using 220-280 ns (black) and 280-340 ns (red) intervals, respectively at 310 K.

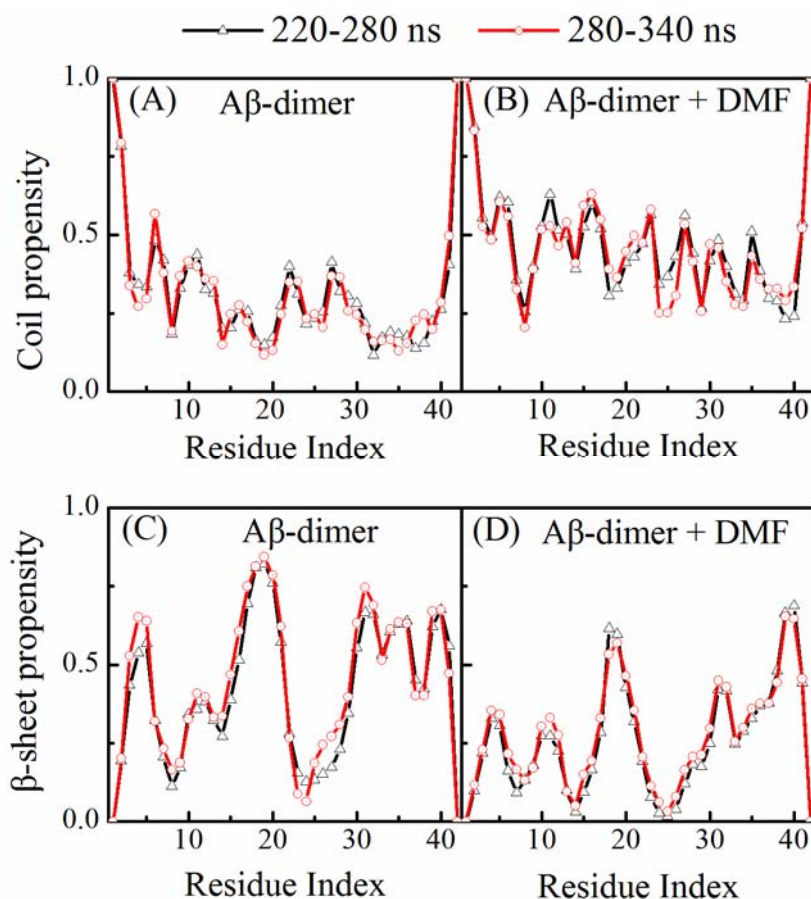

Figure S5. The calculated secondary coil and β-sheet structure propensity of each residue in REMD runs with the time intervals of 220-280 ns (black) and 280-340 ns (red) for Aβ dimer system (A, C) and Aβ dimer with four DMF fullerenes system (B, D) at 310 K.

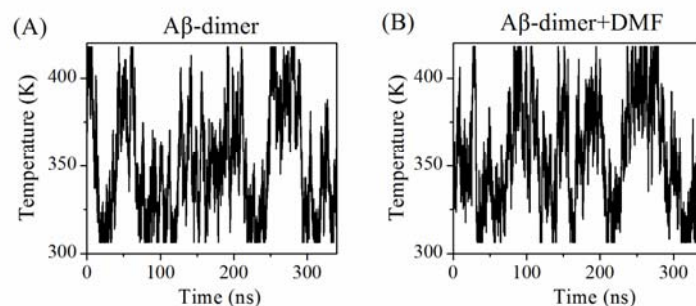

Figure S6: The time evolution of temperature swapping of one representative replica in temperature space for A $\beta$ -dimer system (A) and A $\beta$ -dimer+DMF system (B).

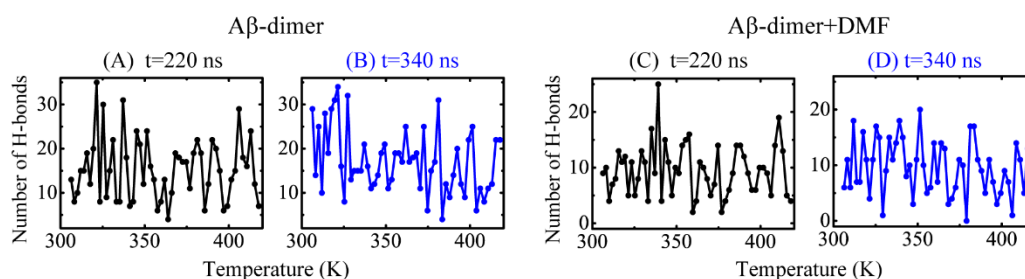

Figure S7: Number of inter-chain H-bonds of the 54 replicas from 306 to 417 K at  $t=220$  and  $340$  ns for A $\beta$ -dimer (A, B) and A $\beta$ -dimer+DMF (C, D) systems.

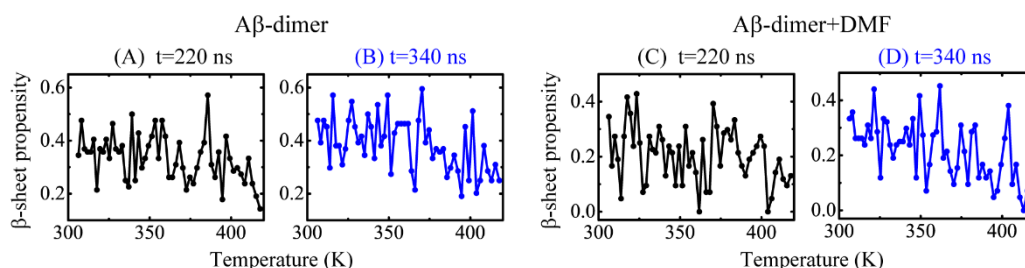

Figure S8:  $\beta$ -sheet propensity of the 54 replicas from 306 to 417 K at  $t=220$  and  $340$  ns for A $\beta$ -dimer (A, B) and A $\beta$ -dimer+DMF (C, D) systems.

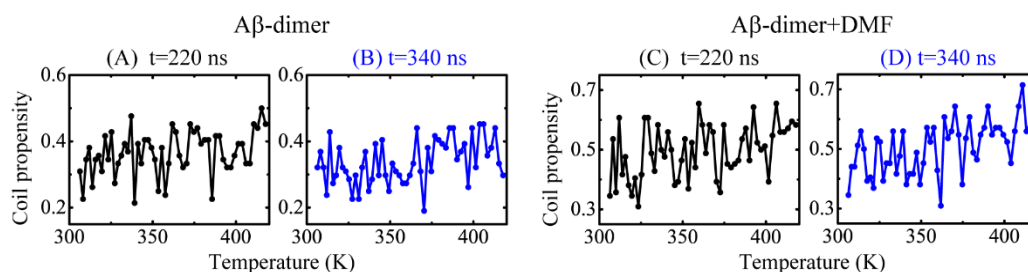

Figure S9: Coil propensity of the 54 replicas from 306 to 417 K at  $t=220$  and  $340$  ns for A $\beta$ -dimer (A, B) and A $\beta$ -dimer+DMF (C, D) systems.

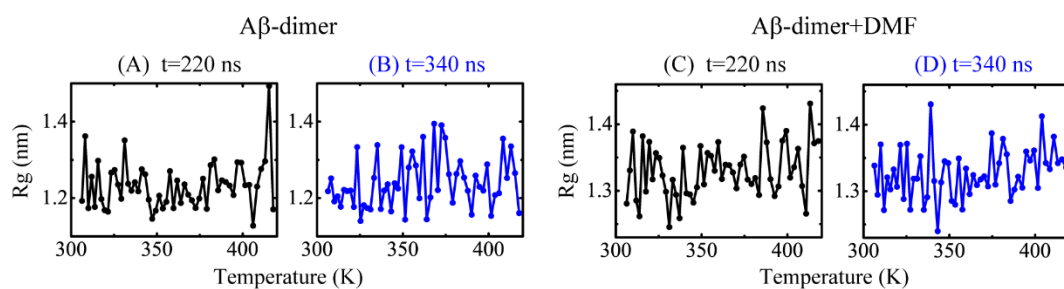

Figure S10: Rg of the 54 replicas from 306 to 417 K at t=220 and 340 ns for Aβ-dimer (A, B) and Aβ-dimer+DMF (C, D) systems.

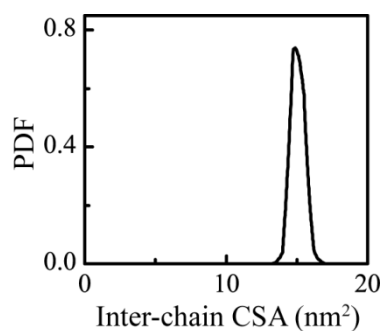

Figure S11. The probability density function (PDF) of average contact surface area (CSA) between DMF molecules and each chain in Aβ dimer.
